# Supplementary material for: Comparative Genomics of Typical and Atypical Aeromonas salmonicida Complete Genomes Revealed New Insights into Pathogenesis Evolution
Source: MDPI journal article supplement (doi:10.3390/microorganisms10010189), 2022-01-15
Supplement: s1 [file s1]

## Supplementary Data

**Table S1.** Enzymatic profile of *A. salmonicida* using the API ZYM system.

| Enzyme Assayed for                 | J409 | J410 | J411 | J223 |
|------------------------------------|------|------|------|------|
| Alkaline phosphatase               | +    | +    | +    | +    |
| Esterase (C <sub>4</sub> )         | +    | -    | -    | -    |
| Esterase lipase (C <sub>8</sub> )  | +    | +    | +    | +    |
| Lipase (C <sub>14</sub> )          | +    | +    | +    | +    |
| Leucine arylamidase                | +    | +    | -    | +    |
| Valine arylamidase                 | -    | +    | -    | -    |
| Cystine arylamidase                | +    | -    | +    | -    |
| Trypsin                            | +    | +    | +    | -    |
| $\alpha$ -Chymotrypsin             | -    | +    | +    | -    |
| Acid Phosphatase                   | +    | +    | +    | +    |
| Naphthol-AS-BI-Phosphohydrolase    | +    | +    | +    | +    |
| $\alpha$ -Galactosidase            | -    | -    | -    | -    |
| $\beta$ -Galactosidase             | -    | -    | -    | -    |
| $\beta$ -Glucuronidase             | -    | -    | -    | -    |
| $\alpha$ -Glucosidase              | -    | -    | -    | -    |
| $\beta$ -Glucosidase               | -    | -    | -    | +    |
| N-Acetyl- $\beta$ -glucosaminidase | -    | +    | -    | -    |
| $\alpha$ -Mannosidase              | -    | -    | -    | -    |
| $\alpha$ -Fucosidase               | -    | -    | -    | -    |

**Table S2.** Enzymatic profile of *A. salmonicida* using API20NE.

| Enzyme Assayed for                | J409    | J410    | J411    | J223    |
|-----------------------------------|---------|---------|---------|---------|
| Reduction of nitrates to nitrites | +       | +       | +       | +       |
| Indole production                 | -       | -       | -       | -       |
| Glucose fermentation              | +       | +       | +       | +       |
| Urease                            | -       | -       | -       | -       |
| $\beta$ -Galactosidase            | +       | +       | +       | -       |
| Hydrolysis of:                    |         |         |         |         |
| Arginine                          | +       | +       | +       | +       |
| Esculin                           | +       | +       | +       | +       |
| Gelatin                           | +       | +       | +       | +       |
| Assimilation of:                  |         |         |         |         |
| D-Glucose                         | +       | +       | +       | +       |
| L-Arabinose                       | +       | +       | +       | -       |
| D-Mannose                         | +       | +       | +       | +       |
| D-Mannitol                        | +       | +       | +       | +       |
| N-acetyl-glucosamine              | +       | +       | +       | +       |
| D-maltose                         | -       | -       | -       | +       |
| Potassium gluconate               | +       | +       | +       | -       |
| Capric acid                       | +       | +       | +       | -       |
| Adipic acid                       | -       | -       | -       | -       |
| Malic acid                        | +       | +       | +       | +       |
| Trisodium citrate                 | +       | +       | +       | -       |
| Phenylacetic acid                 | -       | -       | -       | -       |
| Code                              | 5577555 | 5577555 | 5577555 | 5554244 |

**Table S3.** Enzymatic profile of *A. salmonicida* using the API 20E.

| Enzyme Assayed for          | J409 | J410 | J411 | J223 |
|-----------------------------|------|------|------|------|
| $\beta$ -Galactosidase      | +    | +    | +    | -    |
| Indole production           | +    | +    | +    | -    |
| Acetoin production          | +    | +    | +    | -    |
| Citrate utilization         | -    | -    | -    | -    |
| H <sub>2</sub> S production | -    | -    | -    | -    |
| Urease                      | -    | -    | -    | -    |
| Hydrolysis of:              |      |      |      |      |
| L-Arginine                  | +    | +    | +    | +    |
| L-Lysine                    | +    | +    | +    | -    |
| L-Ornithine                 | +    | +    | +    | -    |
| L-Tryptophane               | -    | -    | -    | -    |
| Gelatinase                  | +    | +    | +    | +    |
| Assimilation of:            |      |      |      |      |
| D-Glucose                   | -    | -    | -    | +    |
| D-Mannitol                  | -    | -    | -    | +    |
| Inositol                    | -    | -    | -    | -    |
| D-Sorbitol                  | -    | -    | -    | -    |
| L-Rhamnose                  | -    | -    | -    | -    |
| D-Saccharose                | +    | +    | +    | -    |
| D-Melibiose                 | -    | -    | -    | -    |
| D-Amygdaline                | -    | -    | -    | +    |
| L-Arabinose                 | -    | -    | -    | -    |

**Table S4.** *A. salmonicida* genomes used in this study.

| Strain | Labels     | Size (Mb) | Topology | RefSeq ID     | INSDC identifier |
|--------|------------|-----------|----------|---------------|------------------|
| J409   | Chromosome | 4.63      | Circular | NZ_CP047374.1 | CP047374.1       |
|        | p1AsJ409   | 0.1       | Circular | NZ_CP047375.1 | CP047375.1       |
| J410   | Chromosome | 4.62      | Circular | NZ_CP047376.1 | CP047376.1       |
|        | p1AsJ410   | 0.072     | Circular | NZ_CP047377.1 | CP047377.1       |
| J411   | Chromosome | 4.63      | Circular | NZ_CP052034.1 | CP052034.1       |
|        | p1AsJ411   | 0.084     | Circular | NZ_CP052035.1 | CP052035.1       |
| J223   | Chromosome | 4.7       | Circular | NZ_CP048223.1 | CP048223.1       |
|        | pASal1     | 0.006     | Circular | NZ_CP048225.1 | CP048225.1       |
|        | pASal2     | 0.005     | Circular | NZ_CP048226.1 | CP048226.1       |
|        | pASal3     | 0.007     | Circular | NZ_CP048227.1 | CP048227.1       |
|        | pASal5     | 0.177     | Circular | NZ_CP048224.1 | CP048224.1       |

**Table S5.** Summary of the RAST annotation genome results.

| Atypical <i>A. salmonicida</i> genome |              |           |              |           |              |           |
|---------------------------------------|--------------|-----------|--------------|-----------|--------------|-----------|
|                                       | J409         |           | J410         |           | J411         |           |
|                                       | Chr          | p1AsJ490  | Chr          | p1AsJ410  | Chr          | p1AsJ411  |
| Genome size                           | 4,632,948 bp | 99,881 bp | 4,617,865 bp | 72,285 bp | 4,631,770 bp | 88,226 bp |
| G+C content                           | 58.7 %       | 53.6%     | 58.7 %       | 54.8      | 58.7 %       | 54.3 %    |
| N° of Subsystems                      | 363          | 2         | 365          | 3         | 364          | 2         |
| N° of CDS                             | 4428         | 141       | 4395         | 104       | 4849         | 157       |
| N° of RNAs                            | 146          | -         | 146          | -         | 152          | -         |
| Typical <i>A. salmonicida</i> J223    |              |           |              |           |              |           |
|                                       | Chr          | pASal1    | pASal2       | pASal3    | pASal5       |           |
| Genome size                           | 4,702,618 bp | 6,139 bp  | 5,247 bp     | 7,021 bp  | 176,655 bp   |           |
| G+C content                           | 58.5 %       | 57.4%     | 52.2 %       | 55.3 %    | 54.8 %       |           |
| N° of Subsystems                      | 344          | -         | -            | 1         | 5            |           |
| N° of CDS                             | 4551         | 11        | 9            | 12        | 238          |           |
| N° of RNAs                            | 144          | -         | -            | -         | -            |           |

**Table S6.** Antibiotic resistance gene identification in atypical *A. salmonicida* strains.

| RGI<br>Criteria                                   | ARO<br>Term                                                              | SNP   | Detection<br>Criteria       | AMR<br>Gene<br>Family                                                         | Drug<br>Class                                                | Resistance<br>Mechanism         | J409                         |             | J410                          |             | J411                           |             |
|---------------------------------------------------|--------------------------------------------------------------------------|-------|-----------------------------|-------------------------------------------------------------------------------|--------------------------------------------------------------|---------------------------------|------------------------------|-------------|-------------------------------|-------------|--------------------------------|-------------|
|                                                   |                                                                          |       |                             |                                                                               |                                                              |                                 | %<br>Identity                | %<br>Length | %<br>Identity                 | %<br>Length | %<br>Identity                  | %<br>Length |
| Strict                                            | adeF                                                                     | -     | protein<br>homolog<br>model | resistance-<br>nodulation-cell<br>division (RND)<br>antibiotic efflux<br>pump | fluoroquinolone<br>antibiotic,<br>tetracycline<br>antibiotic | antibiotic efflux               | 47.32                        | 97.64       | 47.32                         | 97.64       | 46.55                          | 90.56       |
| Strict                                            | Escherichia coli EF-Tu mutants<br>conferring resistance to<br>Pulvomycin | R234F | protein<br>variant<br>model | elfamycin<br>resistant EF-Tu                                                  | elfamycin<br>antibiotic                                      | antibiotic target<br>alteration | 88.55                        | 96.33       | 88.55                         | 96.33       | 88.55                          | 96.33       |
| Gene description                                  |                                                                          |       |                             |                                                                               |                                                              |                                 | J409                         |             | J410                          |             | J411                           |             |
| Beta-lactamase                                    |                                                                          |       |                             |                                                                               |                                                              |                                 | GO992_07995 *                |             | GO994_16895                   |             | GO993_12435 *                  |             |
| Subclass B2 metallo-beta-lactamase ( <i>bla</i> ) |                                                                          |       |                             |                                                                               |                                                              |                                 | GO992_09850<br>GO992_16415 * |             | GO994_031160 *<br>GO994_18760 |             | GO993_14300 *<br>GO993_20940 * |             |
| Class D beta- lactamase ( <i>blaOXA</i> )         |                                                                          |       |                             |                                                                               |                                                              |                                 | GO992_13085                  |             | GO994_22030                   |             | GO993_17570                    |             |

(\*) Indicates a pseudo gene.

**Table S7.** Antibiotic resistance gene identification in typical *A. salmonicida*.

|                                                |                                                                    |       |                       |                                                                  |                                                     |                              | <i>A. salmonicida</i> J223 |            |            |            |            |            |
|------------------------------------------------|--------------------------------------------------------------------|-------|-----------------------|------------------------------------------------------------------|-----------------------------------------------------|------------------------------|----------------------------|------------|------------|------------|------------|------------|
|                                                |                                                                    |       |                       |                                                                  |                                                     |                              | CP048223.1                 |            | CP048225.1 | CP048226.1 | CP048227.1 | CP048224.1 |
| RGI Criteria                                   | ARO Term                                                           | SNP   | Detection Criteria    | AMR Gene Family                                                  | Drug Class                                          | Resistance Mechanism         | % Identity                 | % Length   | -          | -          | -          | -          |
| Strict                                         | <i>adeF</i>                                                        |       | protein homolog model | resistance-nodulation-cell division (RND) antibiotic efflux pump | fluoroquinolone antibiotic, tetracycline antibiotic | antibiotic efflux            | 43.66                      | 98.87      | -          | -          | -          | -          |
| Strict                                         | TRU-1                                                              |       | protein homolog model | TRU beta-lactamase                                               | cephalosporin, penam                                | antibiotic inactivation      | 73.23                      | 100.00     | -          | -          | -          | -          |
| Strict                                         | cphA5                                                              |       | protein homolog model | CphA beta-lactamase                                              | carbapenem                                          | antibiotic inactivation      | 98.8                       | 99.61      | -          | -          | -          | -          |
| Strict                                         | <i>adeF</i>                                                        |       | protein homolog model | resistance-nodulation-cell division (RND) antibiotic efflux pump | fluoroquinolone antibiotic, tetracycline antibiotic | antibiotic efflux            | 47.32                      | 97.64      | -          | -          | -          | -          |
| Strict                                         | Escherichia coli EF-Tu mutants conferring resistance to Pulvomycin | R234F | protein variant model | elfamycin resistant EF-Tu                                        | elfamycin antibiotic                                | antibiotic target alteration | 88.55                      | 96.33      | -          | -          | -          | -          |
| Gene description                               |                                                                    |       |                       |                                                                  |                                                     |                              | CP048223.1                 | CP048225.1 | CP048226.1 | CP048227.1 | CP048224.1 |            |
| <i>ampC</i>                                    |                                                                    |       |                       |                                                                  |                                                     |                              | AXA69_001940               | -          | -          | -          | -          |            |
| Class D beta- lactamase ( <i>blaOXA</i> )      |                                                                    |       |                       |                                                                  |                                                     |                              | AXA69_007990 *             | -          | -          | -          | -          |            |
| CphA family subclass B2 metallo-beta-lactamase |                                                                    |       |                       |                                                                  |                                                     |                              | AXA69_11710                | -          | -          | -          | -          |            |

(\*) Indicates a pseudo gene.

**Table S8.** Insertion sequence abundance in typical and atypical *A. salmonicida* genomes.

| Insertion<br>Sequences<br>Families | <i>A. salmonicida</i> J409 |          | <i>A. salmonicida</i> J410 |          | <i>A. salmonicida</i> J411 |          | <i>A. salmonicida</i> J223 |        |        |        |        |
|------------------------------------|----------------------------|----------|----------------------------|----------|----------------------------|----------|----------------------------|--------|--------|--------|--------|
|                                    | Chrom.                     | p1AsJ409 | Chrom.                     | p1AsJ410 | Chrom.                     | p1AsJ411 | Chrom.                     | pAsal1 | pAsal2 | pAsal3 | pAsal5 |
| <b>IS1</b>                         |                            |          |                            |          |                            |          |                            |        |        |        |        |
| ISAs8                              | 1                          |          | 1                          |          | 1                          |          | 1                          |        |        |        |        |
| Unknown                            | 2                          |          | 2                          |          | 2                          |          | 2                          |        |        |        |        |
| <b>IS110</b>                       |                            |          |                            |          |                            |          |                            |        |        |        |        |
| Unknown                            |                            | 2        |                            | 1        |                            | 1        |                            |        |        |        | 3      |
| <b>IS256</b>                       |                            |          |                            |          |                            |          |                            |        |        |        |        |
| ISAs3                              | 9                          | 3        | 9                          | 1        | 9                          | 1        | 9                          |        |        |        | 4      |
| <b>IS3</b>                         |                            |          |                            |          |                            |          |                            |        |        |        |        |
| ISAs32                             | 1                          |          | 1                          |          | 1                          |          | 1                          |        |        |        |        |
| ISAs33                             |                            |          |                            |          |                            |          | 1                          |        |        |        |        |
| ISAs5                              |                            |          |                            |          |                            |          | 15                         |        |        |        | 2      |
| ISAs6                              | 1                          |          | 1                          |          | 1                          |          | 2                          |        |        |        |        |
| Unknown                            | 9                          |          | 9                          |          | 8                          |          | 6                          |        |        |        | 3      |
| <b>IS4</b>                         |                            |          |                            |          |                            |          |                            |        |        |        |        |
| Unknown                            | 2                          |          | 2                          |          | 2                          |          |                            |        |        |        | 1      |
| <b>IS481</b>                       |                            |          |                            |          |                            |          |                            |        |        |        |        |
| ISAs19                             |                            |          |                            |          |                            |          | 1                          |        |        |        |        |
| <b>IS5</b>                         |                            |          |                            |          |                            |          |                            |        |        |        |        |
| ISAs4                              | 174                        | 11       | 174                        | 8        | 174                        | 4        |                            |        |        |        |        |
| ISAs34                             |                            |          |                            |          |                            |          | 1                          |        |        |        |        |
| Unknown                            | 3                          | 6        | 3                          | 2        | 4                          | 1        |                            |        |        |        | 2      |
| <b>IS5/IS182</b>                   |                            |          |                            |          |                            |          |                            |        |        |        |        |
| Unknown                            | 5                          | 1        | 5                          | 1        | 6                          | 3        |                            |        |        |        |        |
| <b>IS21</b>                        |                            |          |                            |          |                            |          |                            |        |        |        |        |
| ISAs29/ <i>istB</i>                |                            | 1        |                            | 1        |                            |          | 8                          |        |        |        | 4      |
| Unknown                            |                            | 1        |                            | 1        |                            |          | 8                          |        |        |        | 3      |
| <b>IS30</b>                        |                            |          |                            |          |                            |          |                            |        |        |        |        |
| Unknown                            |                            | 1        |                            | 1        |                            | 1        |                            |        |        |        | 4      |
| <b>Tn3</b>                         |                            |          |                            |          |                            |          |                            |        |        |        |        |
| Unknown                            |                            | 1        |                            | 1        |                            |          |                            |        |        |        | 2      |
| <b>ISAs1</b>                       |                            |          |                            |          |                            |          |                            |        |        |        |        |
| Unknown                            | 47                         |          | 46                         |          | 47                         |          |                            |        |        |        |        |
| <b>IS630</b>                       |                            |          |                            |          |                            |          |                            |        |        |        |        |
| Unknown                            | 23                         | 1        | 23                         | 1        | 23                         | 3        | 35                         |        |        |        | 3      |

(\*) N° of copies identified for each ISs. (Data accessed Nov. 09<sup>th</sup>, 2021)
